# Supplementary material
Source: PubMed Central journal article supplement (PMC9229839)

## List of Contents

|                                                                                                                                                                                        |     |
|----------------------------------------------------------------------------------------------------------------------------------------------------------------------------------------|-----|
| <b>Table S1.</b> List of 62 herbs.....                                                                                                                                                 | S3  |
| <b>Table S2.</b> <sup>1</sup> H NMR (600 MHz) data for actinomycin D ( <b>9</b> ) and V ( <b>10</b> ) in CDCl <sub>3</sub> .....                                                       | S4  |
| <b>Table S3.</b> <sup>13</sup> C NMR (150 MHz) data for actinomycin D ( <b>9</b> ) and V ( <b>10</b> ) in CDCl <sub>3</sub> .....                                                      | S5  |
| <b>Table S4.</b> <sup>1</sup> H NMR (600 MHz) data for actinomycin X <sub>0β</sub> ( <b>11</b> ) in CDCl <sub>3</sub> .....                                                            | S6  |
| <b>Table S5.</b> <sup>1</sup> H NMR (600 MHz), and <sup>13</sup> C NMR (150 MHz) data for berberine ( <b>12</b> ) in MeOH- <i>d</i> <sub>4</sub> .....                                 | S7  |
| <b>Table S6.</b> <sup>1</sup> H NMR (600 MHz), and <sup>13</sup> C NMR (150 MHz) data for palmatine ( <b>13</b> ) in MeOH- <i>d</i> <sub>4</sub> .....                                 | S8  |
| <b>Table S7.</b> <sup>1</sup> H NMR (600 MHz), and <sup>13</sup> C NMR (150 MHz) data for coptisine ( <b>14</b> ) in MeOH- <i>d</i> <sub>4</sub> .....                                 | S9  |
| <b>Figure S1.</b> Calibration curve analysis (UV peak area) of 4 intercalators and 1 groove binder.....                                                                                | S10 |
| <b>Figure S2.</b> EIC analysis of the 4 individual intercalators in the assay.....                                                                                                     | S11 |
| <b>Figure S3.</b> EIC analysis of bisbenzimidazole (H33258), melphalan, and 4 intercalators mixture.....                                                                               | S12 |
| <b>Figure S4.</b> Annotation and mirror plot of actinomycin D using GNPS.....                                                                                                          | S13 |
| <b>Figure S5.</b> Annotation and mirror plots of the two analogues of actinomycin D using GNPS.....                                                                                    | S14 |
| <b>Figure S6.</b> Results of the high throughput LLAMAS development.....                                                                                                               | S15 |
| <b>Figure S7.</b> Confirmation of the DNA binding activities of fangchinoline ( <b>15</b> ), tetrandrine ( <b>16</b> ),<br>daurisolone ( <b>17</b> ), and dauricine ( <b>18</b> )..... | S16 |
| <b>Figure S8.</b> <sup>1</sup> H NMR (600 MHz) spectrum of actinomycin D ( <b>9</b> ) in CDCl <sub>3</sub> .....                                                                       | S17 |
| <b>Figure S9.</b> <sup>13</sup> C NMR (150 MHz) spectrum of actinomycin D ( <b>9</b> ) in CDCl <sub>3</sub> .....                                                                      | S18 |
| <b>Figure S10.</b> <sup>1</sup> H NMR (600 MHz) spectrum of actinomycin V ( <b>10</b> ) in CDCl <sub>3</sub> .....                                                                     | S19 |
| <b>Figure S11.</b> <sup>13</sup> C NMR (150 MHz) spectrum of actinomycin V ( <b>10</b> ) in CDCl <sub>3</sub> .....                                                                    | S20 |
| <b>Figure S12.</b> <sup>1</sup> H NMR (600 MHz) spectrum of actinomycin X <sub>0β</sub> ( <b>11</b> ) in CDCl <sub>3</sub> .....                                                       | S21 |
| <b>Figure S13.</b> <sup>1</sup> H NMR (600 MHz) spectrum of berberine ( <b>12</b> ) in MeOH- <i>d</i> <sub>4</sub> .....                                                               | S22 |
| <b>Figure S14.</b> <sup>13</sup> C NMR (150 MHz) spectrum of berberine ( <b>12</b> ) in MeOH- <i>d</i> <sub>4</sub> .....                                                              | S23 |
| <b>Figure S15.</b> <sup>1</sup> H NMR (600 MHz) spectrum of palmatine ( <b>13</b> ) in MeOH- <i>d</i> <sub>4</sub> .....                                                               | S24 |
| <b>Figure S16.</b> <sup>13</sup> C NMR (150 MHz) spectrum of palmatine ( <b>13</b> ) in MeOH- <i>d</i> <sub>4</sub> .....                                                              | S25 |
| <b>Figure S17.</b> <sup>1</sup> H NMR (600 MHz) spectrum of coptisine ( <b>14</b> ) in MeOH- <i>d</i> <sub>4</sub> .....                                                               | S26 |
| <b>Figure S18.</b> <sup>13</sup> C NMR (150 MHz) spectrum of coptisine ( <b>14</b> ) in MeOH- <i>d</i> <sub>4</sub> .....                                                              | S27 |
| <b>Figure S19.</b> <sup>1</sup> H NMR (500 MHz) spectrum of fangchinoline ( <b>15</b> ) in CDCl <sub>3</sub> .....                                                                     | S28 |
| <b>Figure S20.</b> <sup>1</sup> H NMR (500 MHz) spectrum of tetrandrine ( <b>16</b> ) in CDCl <sub>3</sub> .....                                                                       | S29 |
| <b>Figure S21.</b> <sup>1</sup> H NMR (500 MHz) spectrum of daurisolone ( <b>17</b> ) in CDCl <sub>3</sub> .....                                                                       | S30 |
| <b>Figure S22.</b> <sup>1</sup> H NMR (500 MHz) spectrum of dauricine ( <b>18</b> ) in CDCl <sub>3</sub> .....                                                                         | S31 |

**Table S1.** List of 62 herbs.

| Sample # | Common Name                | Genus and species                     |
|----------|----------------------------|---------------------------------------|
| 1        | Vetivert root              | <i>Vetiveria zizanioides</i>          |
| 2        | Canada snakeroot           | <i>Asarum canadense</i>               |
| 3        | Atractylodes               | <i>Atractylodes macrocephala</i>      |
| 4        | Schizandra berries         | <i>Schisandrae chinensis</i>          |
| 5        | Stone root                 | <i>Collinsonia canadensis</i>         |
| 6        | Elecampane                 | <i>Inula helenium</i>                 |
| 7        | Lady's mantle              | <i>Alchemilla vulgaris</i>            |
| 8        | Butterbur                  | <i>Petasites frigidus</i>             |
| 9        | Danshen                    | <i>Salvia miltiorrhiza</i>            |
| 10       | Osha root                  | <i>Ligusticum porteri</i>             |
| 11       | Cinnamon sticks            | <i>Cinnamomum cassia</i>              |
| 12       | Jujube date                | <i>Ziziphus jujuba</i>                |
| 13       | Rehmannia root             | <i>Rehmannia glutinosa</i>            |
| 14       | Muirá puama                | <i>Ptychopetalum olacoides</i>        |
| 15       | Kava root                  | <i>Piper methysticum</i>              |
| 16       | Fo-Ti (He Shou Wu)         | <i>Polygonum multiflorum</i>          |
| 17       | Valerian root              | <i>Valeriana officinalis</i>          |
| 18       | Blue malva                 | <i>Malva officinalis</i>              |
| 19       | Boldo                      | <i>Peumus boldus</i>                  |
| 20       | Alkanet root               | <i>Alkanna tinctoria</i>              |
| 21       | Honeysuckle flowers        | <i>Lonicera japonica</i>              |
| 22       | California poppy           | <i>Eschscholzia californica</i>       |
| 23       | Chinese Licorice           | <i>Glycyrrhiza uralensis</i>          |
| 24       | Chrysanthemum flowers      | <i>Chrysanthemum morifolium</i>       |
| 25       | Horney Goat Weed           | <i>Epimedium brevicornum</i>          |
| 26       | Chaparral                  | <i>Larrea divaricata</i>              |
| 27       | Oakmoss                    | <i>Evernia furfuracea</i>             |
| 28       | Dong Quai                  | <i>Angelica sinensis</i>              |
| 29       | Wakame                     | <i>Alaria marginata</i>               |
| 30       | Astragalus                 | <i>Astragalus membranaceus</i>        |
| 31       | Magnolia bark              | <i>Magnolia officinalis</i>           |
| 32       | Bai Zhi                    | <i>Angelica dahurica</i>              |
| 33       | Peony root                 | <i>Paeonia lactiflora</i>             |
| 34       | Chuan Xin Lian             | <i>Andrographis paniculata</i>        |
| 35       | Poke root                  | <i>Phytolacca americana</i>           |
| 36       | Ajwain seed                | <i>Apium graveolens</i>               |
| 37       | Deer's Tongue leaf         | <i>Trilisa odoratissima</i>           |
| 38       | Kelp                       | <i>Nereocystis sp.</i>                |
| 39       | Eleuthero                  | <i>Eleutherococcus senticosus</i>     |
| 40       | Goldthread                 | <i>Coptis chinensis</i>               |
| 41       | Bupleurum                  | <i>Bupleurum chinense</i>             |
| 42       | Chaste Tree berry          | <i>Vitex agnus-castus</i>             |
| 43       | Codonopsis                 | <i>Codonopsis pilosula</i>            |
| 44       | Lycii (Goji berry) berries | <i>Lycium chinense</i>                |
| 45       | Calamus root               | <i>Acorus calamus</i>                 |
| 46       | Quassia                    | <i>Quassia amara</i>                  |
| 47       | Orris root                 | <i>Iris germanica var. Florentina</i> |
| 48       | Papaya leaf                | <i>Carica papaya</i>                  |
| 49       | Angelica                   | <i>Angelica archangelica</i>          |
| 50       | Tansy flowering tops       | <i>Tanacetum vulgare</i>              |
| 51       | Corydalis root             | <i>Corydalis yanhusuo</i>             |
| 52       | Isatis                     | <i>Brassicaceae sp.</i>               |
| 53       | Pau D'arco                 | <i>Tabebuia impetiginosa</i>          |
| 54       | Pygeum                     | <i>Pygeum africanum</i>               |
| 55       | Gymnema sylvestre          | <i>Gymnema sylvestre</i>              |
| 56       | Tonka bean                 | <i>Dipteryx odorata</i>               |
| 57       | Chuan xiong                | <i>Ligusticum wallichii</i>           |
| 58       | Blue flag                  | <i>Iris versicolor</i>                |
| 59       | Job's tears                | <i>Coix lacryma-jobi</i>              |
| 60       | Skullcap                   | <i>Scutellaria baicalensis</i>        |
| 61       | Reishi mushroom            | <i>Ganoderma lucidum</i>              |
| 62       | High John the Conqueror    | <i>Ipomea jalapa</i>                  |

**Table S2.**  $^1\text{H}$  NMR (600 MHz) data for actinomycin D (**9**) and V (**10**) in  $\text{CDCl}_3$ 

| No.    | <b>9</b>                       | <b>10</b>                       |
|--------|--------------------------------|---------------------------------|
| 3      | 7.59, d (7.7)                  | 7.59, d (7.7)                   |
| 4      | 7.35, d (7.8)                  | 7.36, d (7.7)                   |
| 2'     | 4.51, dd (7.1, 2.5)            | 4.58, m                         |
| 4'     | 3.53, dd (9.5, 6.0)            | 3.59, m                         |
| 5'     | 2.16, m                        | 2.13, m                         |
| 6'     | 1.09, d (6.6) <sup>b</sup>     | 1.13, d (6.8) <sup>b</sup>      |
| 7'     | 0.85, d (6.6) <sup>b</sup>     | 0.91, d (6.8) <sup>b</sup>      |
| 9'     | 3.70, m; 3.95, m               | 3.98, d (19.5); 4.54, m         |
| 10'    | 2.07, 2.23, m                  | --                              |
| 11'    | 1.80, m; 2.61, m               | 2.34, d (17.5); 3.65 d (17.2)   |
| 12'    | 5.98, d (9.2)                  | 6.56, d (10.0)                  |
| 14'    | 2.85, s                        | 2.90, s <sup>d</sup>            |
| 15'    | 3.63, d (17.5); 4.71, d (17.5) | 3.71, m; 4.59, m                |
| 17'    | 2.91, s                        | 2.93, s                         |
| 18'    | 2.67, d (9.4)                  | 2.66, m <sup>c</sup>            |
| 19'    | 2.61, m                        | 2.64, m                         |
| 20'    | 0.72, d (6.6) <sup>a</sup>     | 0.75, d (6.0) <sup>a</sup>      |
| 21'    | 0.92, d (6.5) <sup>a</sup>     | 0.95, d (6.0) <sup>a</sup>      |
| 23'    | 5.19, dd (6.5, 2.4)            | 5.25, dd (5.6, 2.2)             |
| 24'    | 1.22, d (6.3)                  | 1.26, d (6.7)                   |
| NH-2'  | 7.15, d (7.0)                  | 7.17, d (7.3)                   |
| NH-4'  | 8.19, d (6.0)                  | 7.76, d (5.8)                   |
| 2''    | 4.61, dd (6.7, 2.5)            | 4.52, m                         |
| 4''    | 3.56, dd (10.0, 6.0)           | 3.70, m                         |
| 5''    | 2.12, m                        | 2.23, m                         |
| 6''    | 1.08, d (6.6) <sup>b</sup>     | 1.15, d (6.8) <sup>b</sup>      |
| 7''    | 0.87, d (6.6) <sup>b</sup>     | 0.90, d (6.8) <sup>b</sup>      |
| 9''    | 3.67, m; 3.81, m               | 3.73, m; 3.91m                  |
| 10''   | 2.07, 2.23, m                  | 2.21, m; 2.27, m                |
| 11''   | 1.84, m; 2.90, m               | 1.86, m; another H not detected |
| 12''   | 5.9, d (9.2)                   | 5.94, d (9.2)                   |
| 14''   | 2.85, s                        | 2.89, s <sup>d</sup>            |
| 15''   | 3.60, d (17.5); 4.79, d (17.5) | 3.65, d (17.4); 4.71, d (17.5)  |
| 17''   | 2.90, s                        | 2.91, s                         |
| 18''   | 2.67, d (9.4)                  | 2.71, m <sup>c</sup>            |
| 19''   | 2.61, m                        | 2.63, m                         |
| 20''   | 0.72, d (6.6) <sup>a</sup>     | 0.74, d (6.0) <sup>a</sup>      |
| 21''   | 0.94, d (6.5) <sup>a</sup>     | 0.98, d (6.0) <sup>a</sup>      |
| 23''   | 5.15, dd (6.5, 2.4)            | 5.17, dd (6.2, 2.2)             |
| 24''   | 1.22, d (6.3)                  | 1.12, d (6.6)                   |
| NH-2'' | 7.7, d (6.6)                   | 7.68, d (5.8)                   |
| NH-4'' | 8.01, d (6.2)                  | 8.23, d (6.0)                   |

<sup>a-d</sup>The data with the same labels in each column may be interchanged.

\* The reported NMR data refers to Zhang, X. F.; Ye, X. W.; Chai, W. Y.; Lian, X. Y.; Zhang, Z. Z. *Mar. Drugs* **2016**, *14*, 181

**Table S3.**  $^{13}\text{C}$  NMR (150 MHz) data for actinomycin D (**9**) and V (**10**) in  $\text{CDCl}_3$ 

| No.  | <b>9</b> | <b>10</b> | No.  | <b>9</b> | <b>10</b> |
|------|----------|-----------|------|----------|-----------|
| 1    | 129.2    | 129.3     | 17'  | 39.3     | 39.5      |
| 2    | 132.5    | 132.2     | 18'' | 71.2     | 71.3      |
| 3    | 125.8    | 126.2     | 18'  | 71.4     | 71.6      |
| 4    | 130.4    | 130.5     | 19'' | 27.0     | 27.2      |
| 5    | 127.8    | 128.1     | 19'  | 27.1     | 27.1      |
| 6    | 140.6    | 140.7     | 2''  | 54.9     | 55.1      |
| 7    | 145.2    | 145.2     | 2'   | 55.2     | 54.9      |
| 8    | 113.6    | 113.8     | 20'' | 19.1     | 19.2      |
| 9    | 179.1    | 179.2     | 20'  | 19.2     | 19.2      |
| 10   | 147.7    | 147.5     | 21'' | 21.7     | 21.9      |
| 11   | 101.7    | 101.9     | 21'  | 21.6     | 21.7      |
| 12   | 145.9    | 146.1     | 22'' | 167.8    | 167.6     |
| 13   | 15.1     | 15.2      | 22'  | 167.7    | 167.6     |
| 14   | 7.8      | 7.9       | 23'' | 75.1     | 74.9      |
| 1''  | 166.6    | 166.4     | 23'  | 75.0     | 74.8      |
| 1'   | 166.7    | 166.4     | 24'' | 17.8     | 17.8      |
| 10'' | 22.9     | 23.1      | 24'  | 17.4     | 17.3      |
| 10'  | 23.1     | 208.9     | 3''  | 169.1    | 169.2     |
| 11'' | 31.4     | 31.2      | 3'   | 168.7    | 169.1     |
| 11'  | 31.0     | 42.0      | 4''  | 58.8     | 57.4      |
| 12'' | 56.6     | 56.7      | 4'   | 58.9     | 58.8      |
| 12'  | 56.4     | 54.5      | 5''  | 31.9     | 32.1      |
| 13'' | 173.4    | 173.7     | 5'   | 31.6     | 31.9      |
| 13'  | 173.4    | 172.9     | 6''  | 19.1     | 19.1      |
| 14'' | 35.0     | 35.2      | 6'   | 19.1     | 19.0      |
| 14'  | 35.1     | 35.0      | 7''  | 19.3     | 19.4      |
| 15'' | 51.4     | 51.5      | 7'   | 19.4     | 19.3      |
| 15'  | 51.4     | 51.5      | 8''  | 173.7    | 173.5     |
| 16'' | 166.7    | 166.7     | 8'   | 173.3    | 174.2     |
| 16'  | 166.4    | 166.0     | 9''  | 47.7     | 47.6      |
| 17'' | 39.2     | 39.2      | 9'   | 47.4     | 53.0      |

\* The reported NMR data refers to Zhang, X. F.; Ye, X. W.; Chai, W. Y.; Lian, X. Y.; Zhang, Z. Z. *Mar. Drugs* **2016**, *14*, 181

**Table S4.**  $^1\text{H}$  NMR (600 MHz) data for actinomycin X $_{\beta}$  (**11**) in  $\text{CDCl}_3$ 

| No.    | $\delta_{\text{H}}$ (J in Hz)  |
|--------|--------------------------------|
| 3      | 7.65, d (7.7)                  |
| 4      | 7.35, d (7.8)                  |
| 2'     | 4.83, dd (6.2, 2.2)            |
| 4'     | 3.57, m                        |
| 6'     | 1.12, d (6.7) <sup>d</sup>     |
| 7'     | 0.88, d (6.7) <sup>d</sup>     |
| 12'    | 6.07, dd (9.3, 2.7)            |
| 14'    | 2.88, s                        |
| 15'    | 3.60, m; 4.54, d (17.6)        |
| 17'    | 2.93, s <sup>a</sup>           |
| 18'    | 2.68, (9.1)                    |
| 19'    | 2.66, m                        |
| 20'    | 0.74, d (6.7) <sup>b</sup>     |
| 21'    | 0.96, d (6.7) <sup>b</sup>     |
| 23'    | 5.25, m                        |
| 24'    | 1.29, d (6.2) <sup>c</sup>     |
| NH-2'  | 7.46, d (6.2)                  |
| NH-4'  | 7.51, d (6.9)                  |
| 2''    | 4.5, d (6.2, 2.5)              |
| 4''    | 3.74, t                        |
| 6''    | 1.14, d (6.7) <sup>d</sup>     |
| 7''    | 0.91, d (6.7) <sup>d</sup>     |
| 12''   | 5.99, d (9.2)                  |
| 14''   | 2.88, s                        |
| 15''   | 3.66, d (17.2); 4.73, d (17.3) |
| 17''   | 2.94, s <sup>a</sup>           |
| 18''   | 2.72, (9.3)                    |
| 19''   | 2.66, m                        |
| 20''   | 0.75, d (6.7) <sup>b</sup>     |
| 21''   | 0.97, d (6.7) <sup>b</sup>     |
| 23''   | 5.25, m                        |
| 24''   | 1.26, d (6.2) <sup>c</sup>     |
| NH-2'' | 7.91, d (6.3)                  |
| NH-4'' | 8.19, d (5.6)                  |

<sup>a-d</sup> The data with the same labels may be interchanged.

\* The reported NMR data refers to Zhang, X. F.; Ye, X. W.; Chai, W. Y.; Lian, X. Y.; Zhang, Z. Z. *Mar. Drugs* **2016**, *14*, 181

**Table S5.** <sup>1</sup>H NMR (600 MHz), and <sup>13</sup>C NMR (150 MHz) data for berberine (**12**) in MeOH-*d*<sub>4</sub>

| No.                | $\delta_{\text{H}}$ (J in Hz) | $\delta_{\text{C}}$ (ppm) |
|--------------------|-------------------------------|---------------------------|
| 1                  | 7.64, s                       | 105.3                     |
| 2                  |                               | 148.7                     |
| 3                  |                               | 150.8                     |
| 4                  | 6.94, s                       | 108.2                     |
| 4a                 |                               | 130.7                     |
| 5                  | 3.24, t (6.4)                 | 27.0                      |
| 6                  | 4.91, t (6.4)                 | 56.0                      |
| 8                  | 9.75, s                       | 145.2                     |
| 8a                 |                               | 122.1                     |
| 9                  |                               | 144.6                     |
| 9-OMe              | 4.18, s                       | 61.3                      |
| 10                 |                               | 151.0                     |
| 10-OMe             | 4.09, s                       | 56.4                      |
| 11                 | 7.98, d (8.4)                 | 126.8                     |
| 12                 | 8.10, d (8.3)                 | 123.3                     |
| 12a                |                               | 134.0                     |
| 13                 | 8.69, s                       | 120.3                     |
| 13a                |                               | 138.5                     |
| 13b                |                               | 120.7                     |
| OCH <sub>2</sub> O | 6.09, s                       | 102.5                     |

\* The reported NMR data refers to Jung, H. A.; Yoon, N. Y.; Bae, H. J.; Min, B. S.; Choi, J. S. *Arch. Pharm. Res.* **2008**, *31*, 1405-1412.

**Table S6.**  $^1\text{H}$  NMR (600 MHz), and  $^{13}\text{C}$  NMR (150 MHz) data for palmatine (**13**) in  $\text{MeOH-}d_4$ 

| No.    | $\delta_{\text{H}}$ (J in Hz) | $\delta_{\text{C}}$ (ppm) |
|--------|-------------------------------|---------------------------|
| 1      | 7.67, s                       | 109.9                     |
| 2      |                               | 150.9                     |
| 3      |                               | 153.8                     |
| 4      | 7.05, s                       | 112.2                     |
| 5      | 3.28, m                       | 27.8                      |
| 6      | 4.94, m                       | 56.7                      |
| 8      | 9.77, s                       | 146.4                     |
| 9      |                               | 145.8                     |
| 10     |                               | 151.9                     |
| 11     | 8.12, d (8.9)                 | 124.4                     |
| 12     | 8.01, d (9.0)                 | 128.1                     |
| 13     | 8.81, s                       | 121.3                     |
| 10-OMe | 3.94, s                       | 57.6                      |
| 12a    |                               | 135.3                     |
| 13a    |                               | 139.8                     |
| 13b    |                               | 123.3                     |
| 2-OMe  | 3.99, s                       | 57.3                      |
| 3-OMe  | 4.11, s                       | 57.0                      |
| 4a     |                               | 130.1                     |
| 8a     |                               | 120.5                     |
| 9-OMe  | 4.21, s                       | 62.5                      |

\* The reported NMR data refers to Jung, H. A.; Yoon, N. Y.; Bae, H. J.; Min, B. S.; Choi, J. S. *Arch. Pharm. Res.* **2008**, *31*, 1405-1412.

**Table S7.**  $^1\text{H}$  NMR (600 MHz), and  $^{13}\text{C}$  NMR (150 MHz) data for coptisine (**14**) in  $\text{MeOH-}d_4$ 

| No.                | $\delta_{\text{H}}$ ( $J$ in Hz) | $\delta_{\text{C}}$ (ppm) |
|--------------------|----------------------------------|---------------------------|
| 1                  | 7.65, s                          | 106.4                     |
| 2                  |                                  | 149.3                     |
| 3                  |                                  | 150.0                     |
| 4                  | 6.96, s                          | 109.4                     |
| 5                  | 3.25, m                          | 28.1                      |
| 6                  | 4.89, m                          | 57.2                      |
| 8                  | 9.72, s                          | 145.8                     |
| 9                  |                                  | 145.3                     |
| 10                 |                                  | 152.2                     |
| 11                 | 7.88, d (8.5)                    | 121.9                     |
| 12                 | 7.86, d (8.5)                    | 123.1                     |
| 13                 | 8.74, s                          | 122.3                     |
| 12a                |                                  | 134.4                     |
| 13a                |                                  | 139.0                     |
| 13b                |                                  | 122.5                     |
| 4a                 |                                  | 131.8                     |
| 8a                 |                                  | 113.7                     |
| OCH <sub>2</sub> O | 6.47, s                          | 106.2                     |
| OCH <sub>2</sub> O | 6.11, s                          | 103.7                     |

\* The reported NMR data refers to Jung, H. A.; Yoon, N. Y.; Bae, H. J.; Min, B. S.; Choi, J. S. *Arch. Pharm. Res.* **2008**, *31*, 1405-1412.



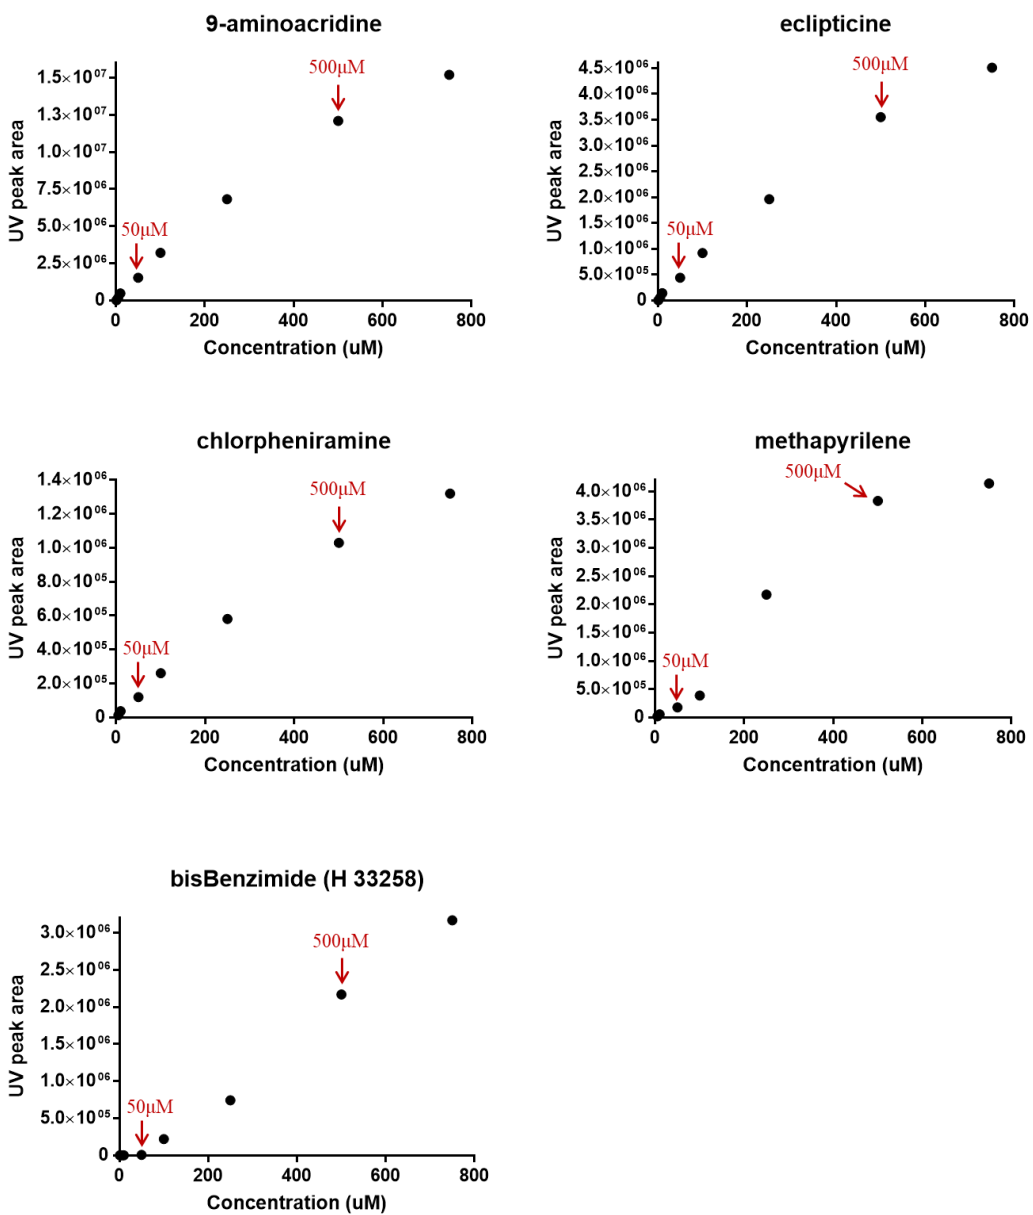

**Figure S1.** Calibration curve analysis (UV peak area) of 4 intercalators (1-4) and 1 groove binder (5)

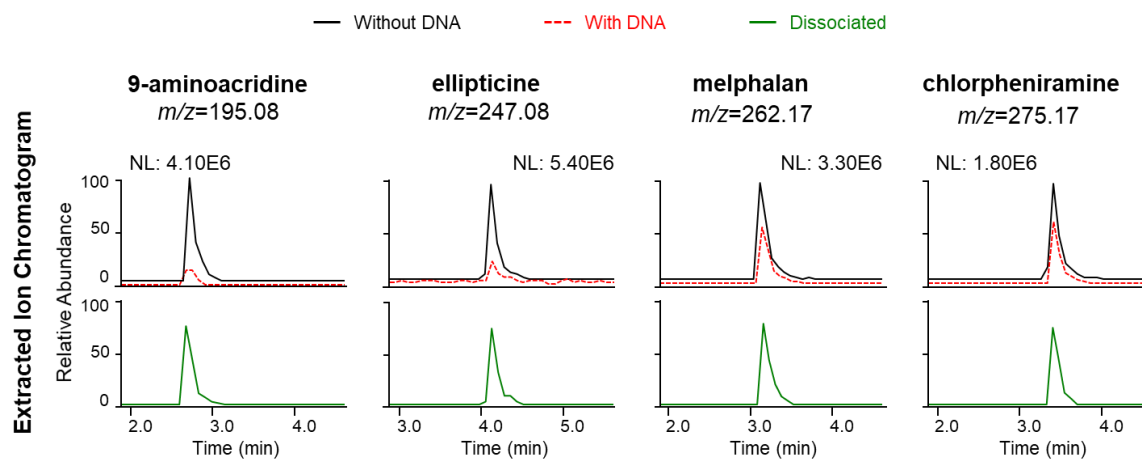

**Figure S2.** EIC analysis of the 4 individual intercalators (**1-4**) in the assay.

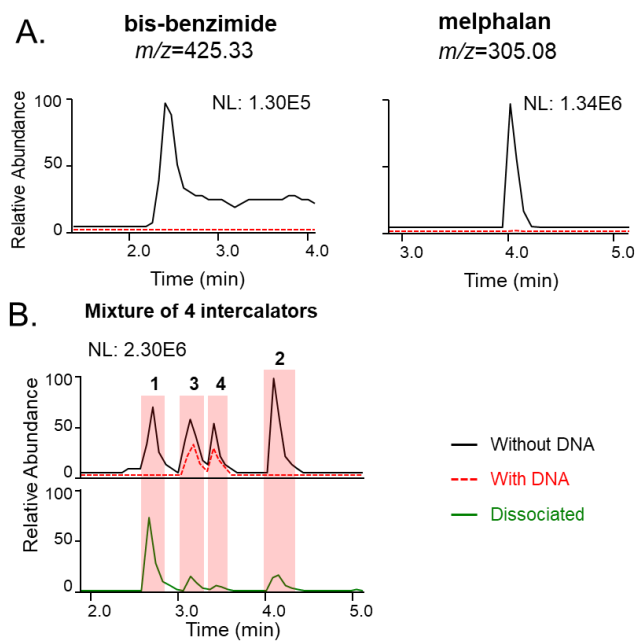

**Figure S3.** EIC analysis of bisbenzimidazole (H33258) (**5**), melphalan (**7**), and 4 intercalators (**1-4**) mixture.

|                              |                    |
|------------------------------|--------------------|
| <b><i>m/z</i></b>            | 1255.75            |
| <b>RT (min)</b>              | 8.64               |
| <b>annotation</b>            | actinomycin D      |
| <b>cosine score</b>          | 0.96               |
| <b><i>m/z</i> error (Da)</b> | 0.11               |
| <b>reference Spectrum ID</b> | CCMSLIB00000006871 |

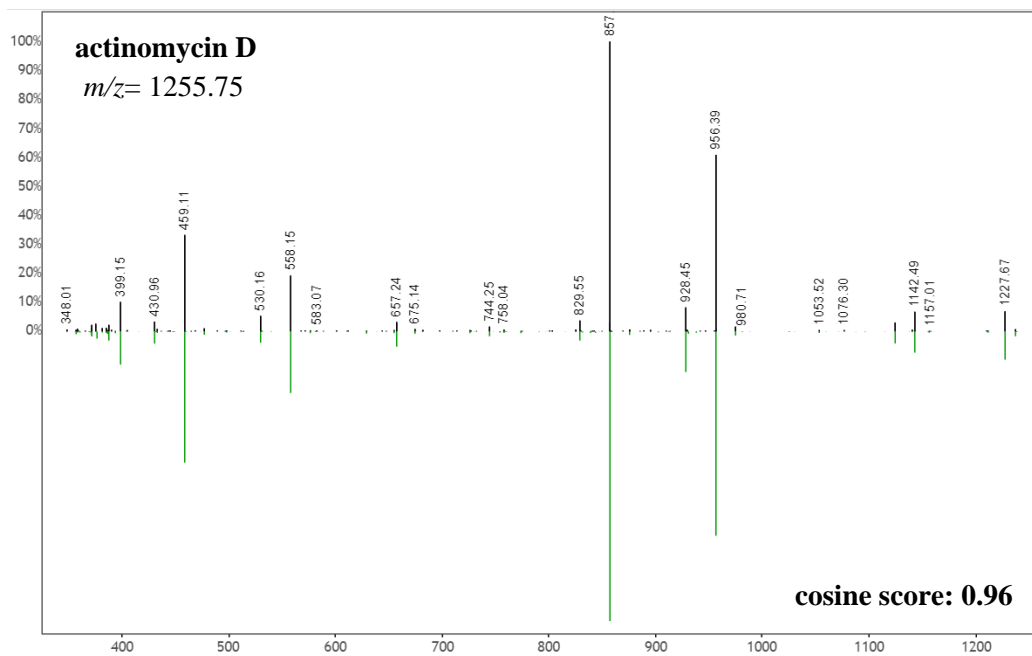

**Figure S4.** Annotation and mirror plot of actinomycin D (9) using GNPS.

|                              |                      |                      |
|------------------------------|----------------------|----------------------|
| <b><i>m/z</i></b>            | 1269.67              | 1271.75              |
| <b>RT (min)</b>              | 8.64                 | 7.77                 |
| <b>annotation</b>            | actinomycin D +14 Da | actinomycin D +16 Da |
| <b>cosine score</b>          | 0.92                 | 0.91                 |
| <b><i>m/z</i> error (Da)</b> | 0.1                  | 0.12                 |
| <b>reference Spectrum ID</b> | CCMSLIB00000081798   | CCMSLIB00000006871   |

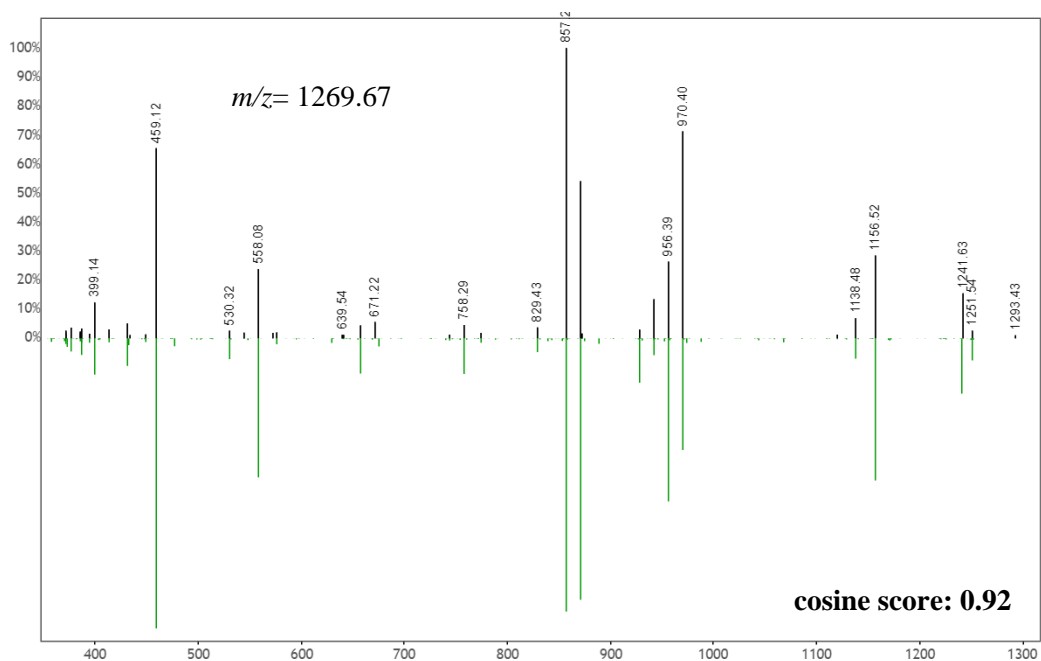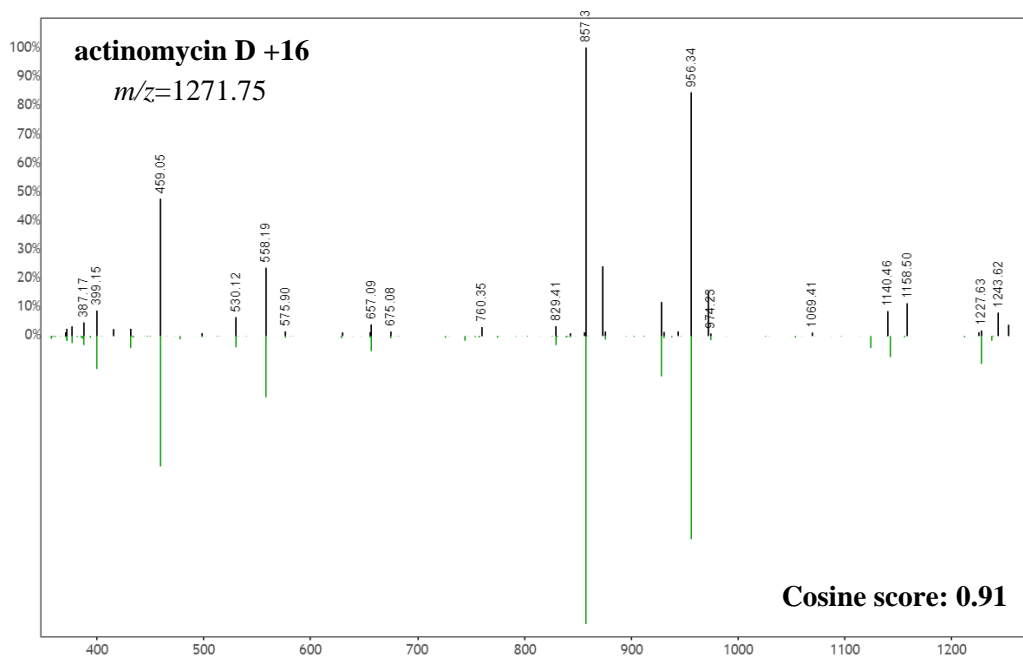

**Figure S5.** Annotation and mirror plots of the two analogues of actinomycin D (9) using GNPS.

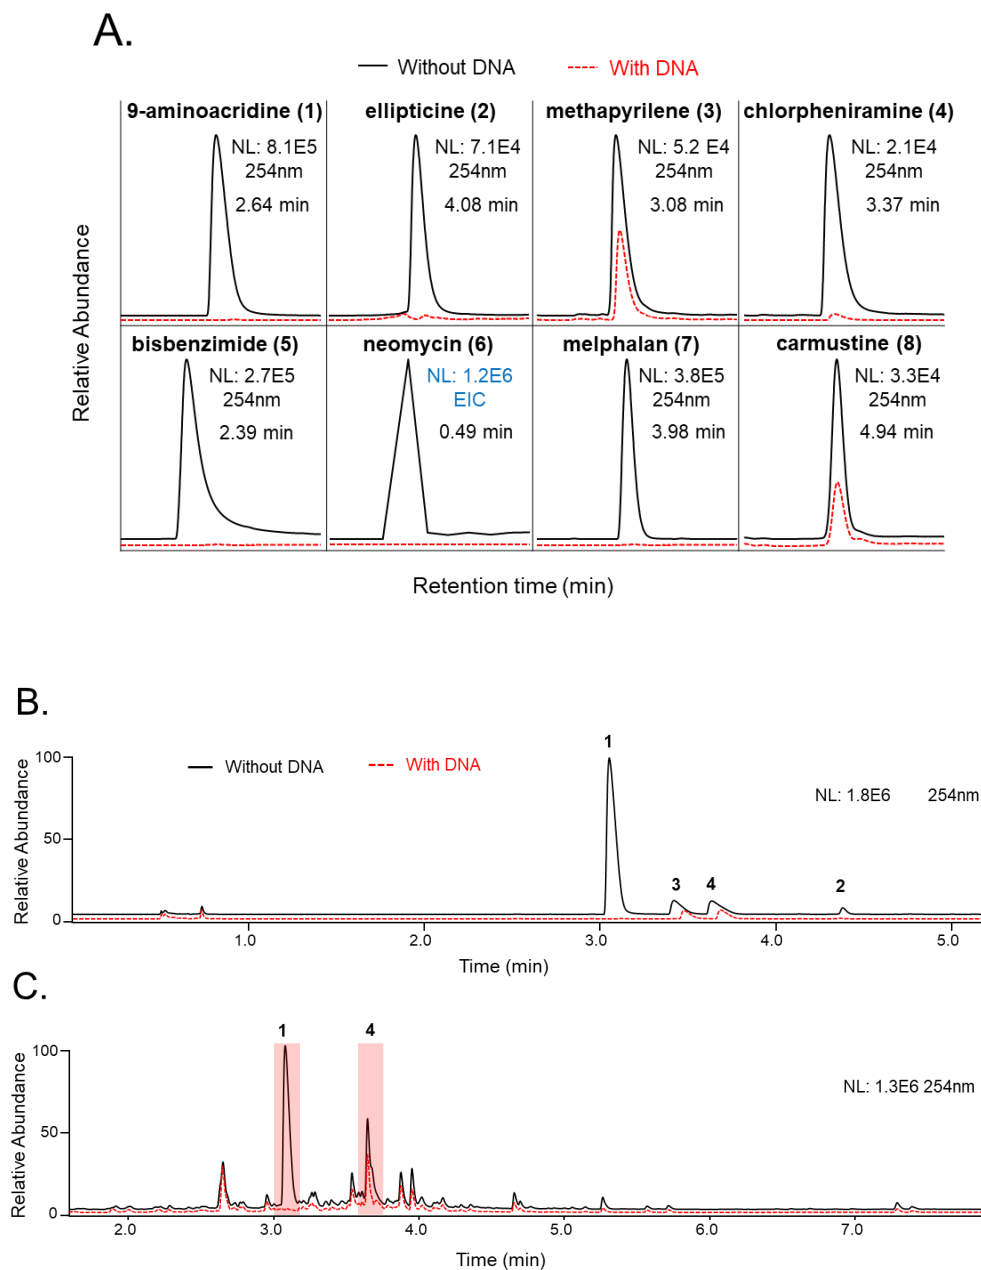

**Figure S6.** Results of the high throughput LLAMAS development. **A)** Performance of the 8 DNA binding agents including: 4 intercalators [9-aminoacridine (**1**), 34  $\mu\text{M}$ ], ellipticine (**2**), 54  $\mu\text{M}$ ], methapyrilene (**3**), 45  $\mu\text{M}$ ], and chlorpheniramine (**4**), 34  $\mu\text{M}$ ], 2 groove binders [bisBenzimidazole (H 33258) (**5**), 125  $\mu\text{g}$   $\mu\text{M}$ ], and neomycin (**6**), 157  $\mu\text{M}$ ], and 2 covalent binders [melphalan (**7**), 44  $\mu\text{M}$ ] and carmustine (**8**), 62  $\mu\text{M}$ ] in the assay. The DNA binding capability of neomycin was confirmed by analysis of the EIC trace ( $m/z$  of 615.09-615.51); while other compounds were examined by using PDA-derived data. **B)** Performance of the mixture of 4 DNA intercalators (**1-4**) in the assay. **C)** DNA intercalators 9-aminoacridine (**1**) and ellipticine (**4**) were successfully detected in a complex mixture of wild herbaceous plant extract [spike-in ratio, 1:5:250 (w:w:w)].

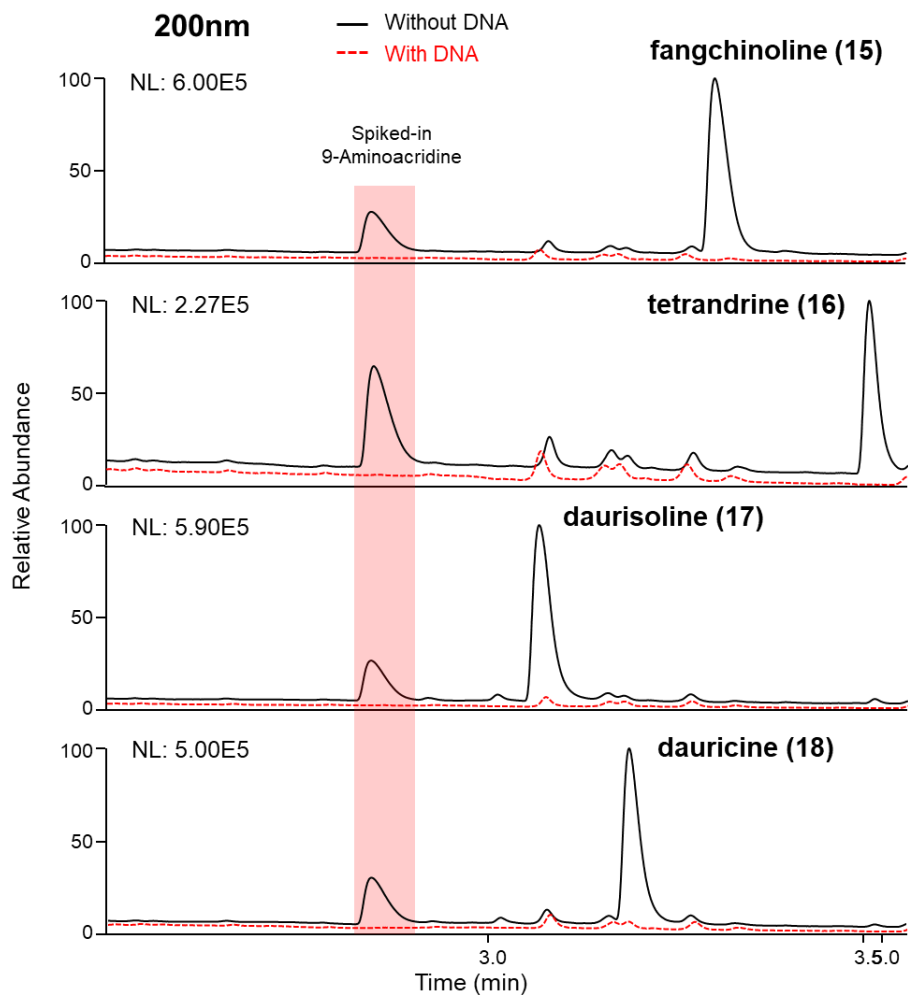

**Figure S7.** Confirmation of the DNA binding activities of fangchinoline (**15**), tetrandrine (**16**), daurisolone (**17**), and dauricine (**18**). UV chromatogram (monitored at  $\lambda$ 200 nm) revealed that the compounds were retained by the DNA.

**Figure S8.**  $^1\text{H}$  NMR (600 MHz) spectrum of actinomycin D (**9**) in  $\text{CDCl}_3$

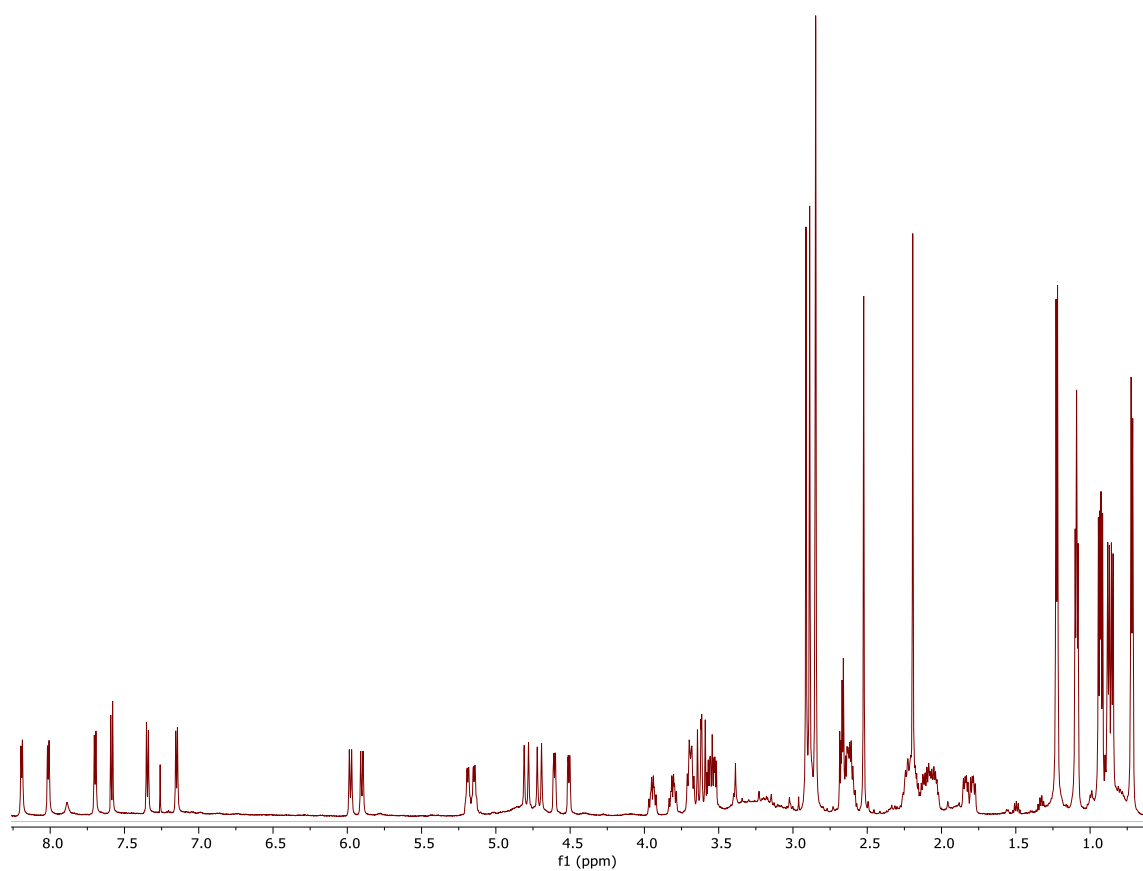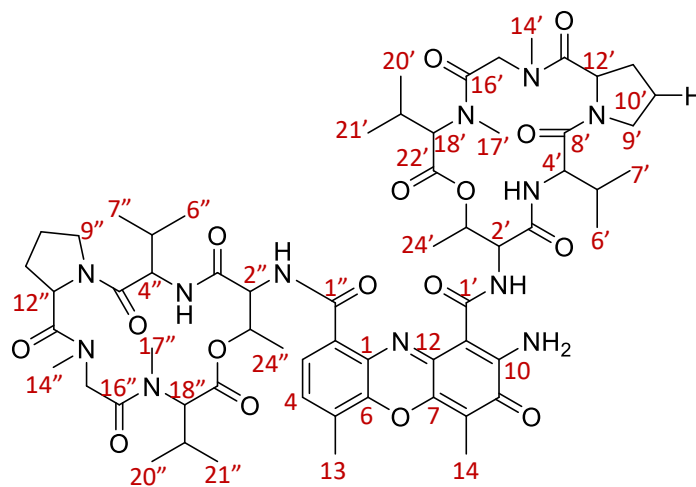



**Figure S9.**  $^{13}\text{C}$  NMR (600 MHz) spectrum of actinomycin D (**9**) in  $\text{CDCl}_3$

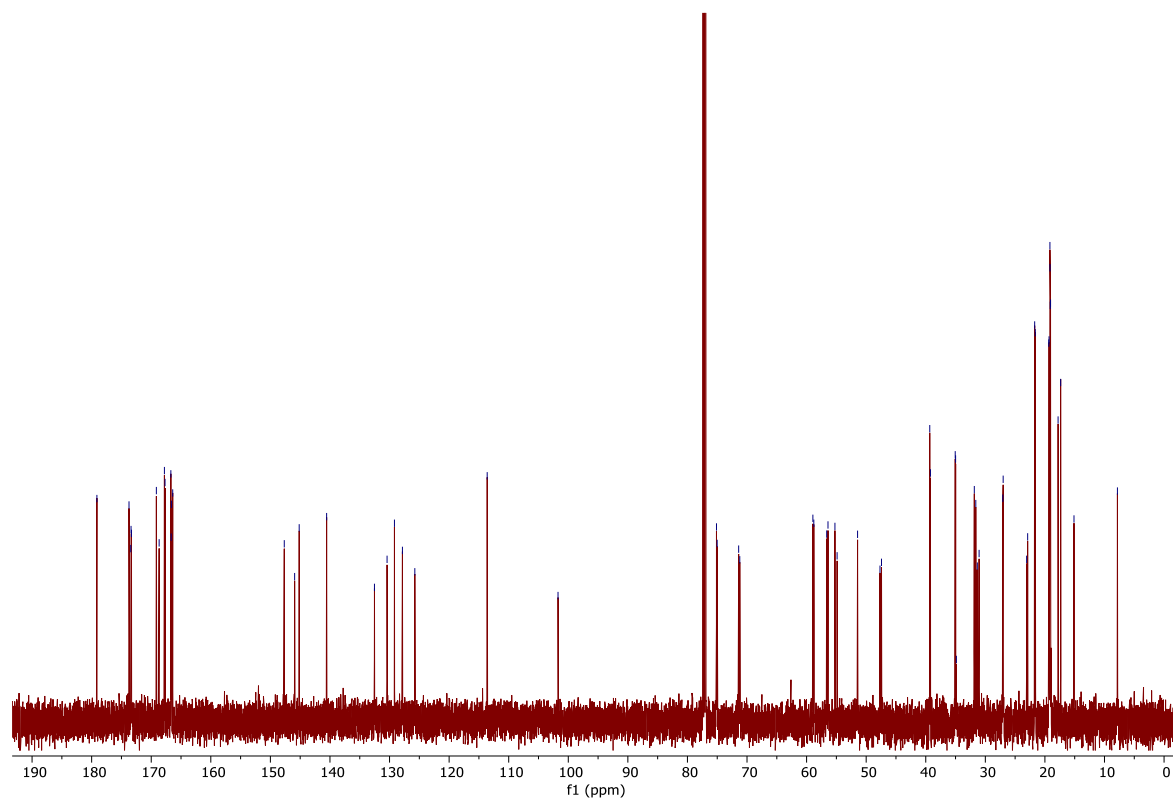

**Figure S10.**  $^1\text{H}$  NMR (600 MHz) spectrum of actinomycin V (**10**) in  $\text{CDCl}_3$

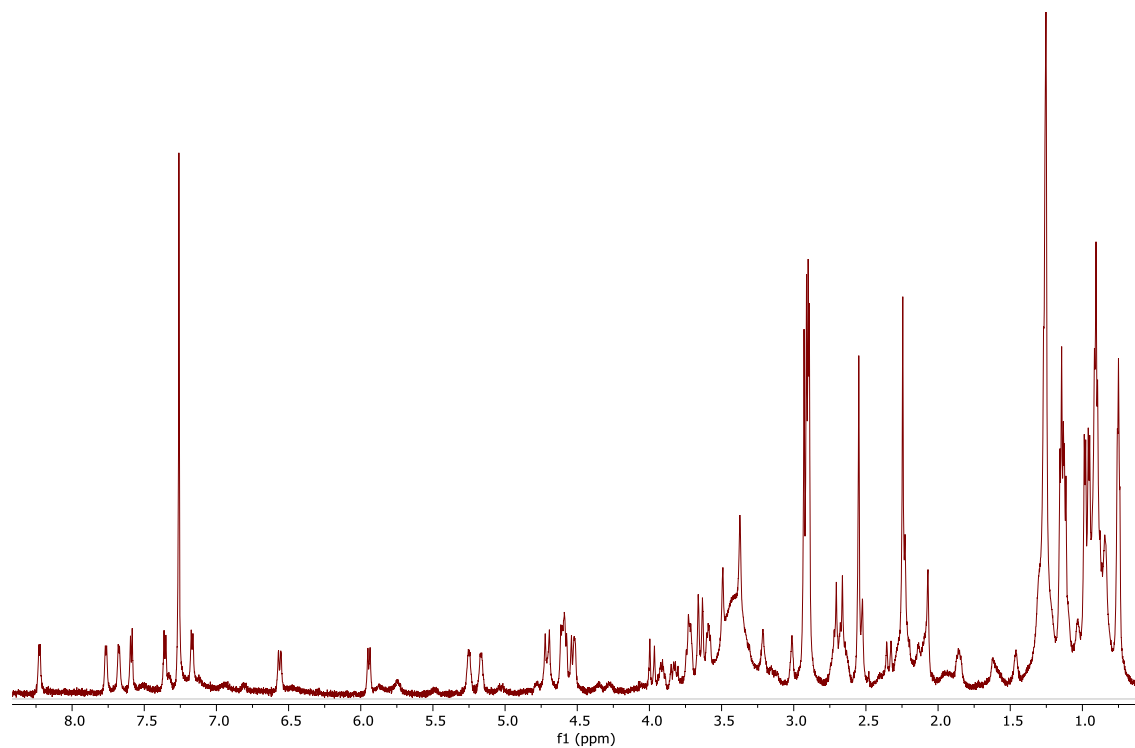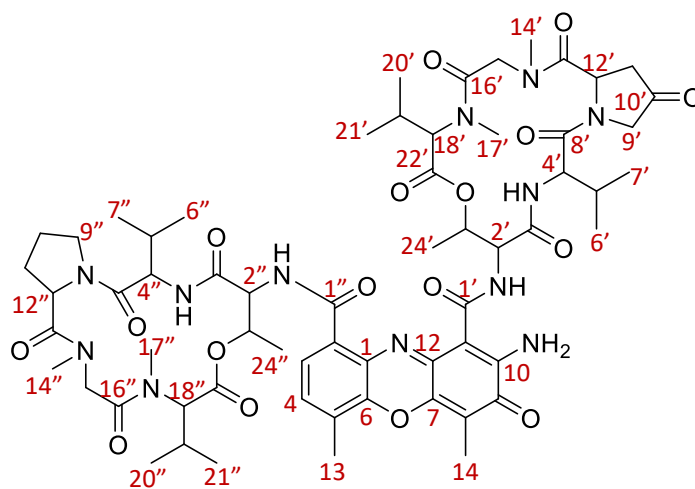

**Figure S11.**  $^{13}\text{C}$  NMR (600 MHz) spectrum of actinomycin V (**10**) in  $\text{CDCl}_3$

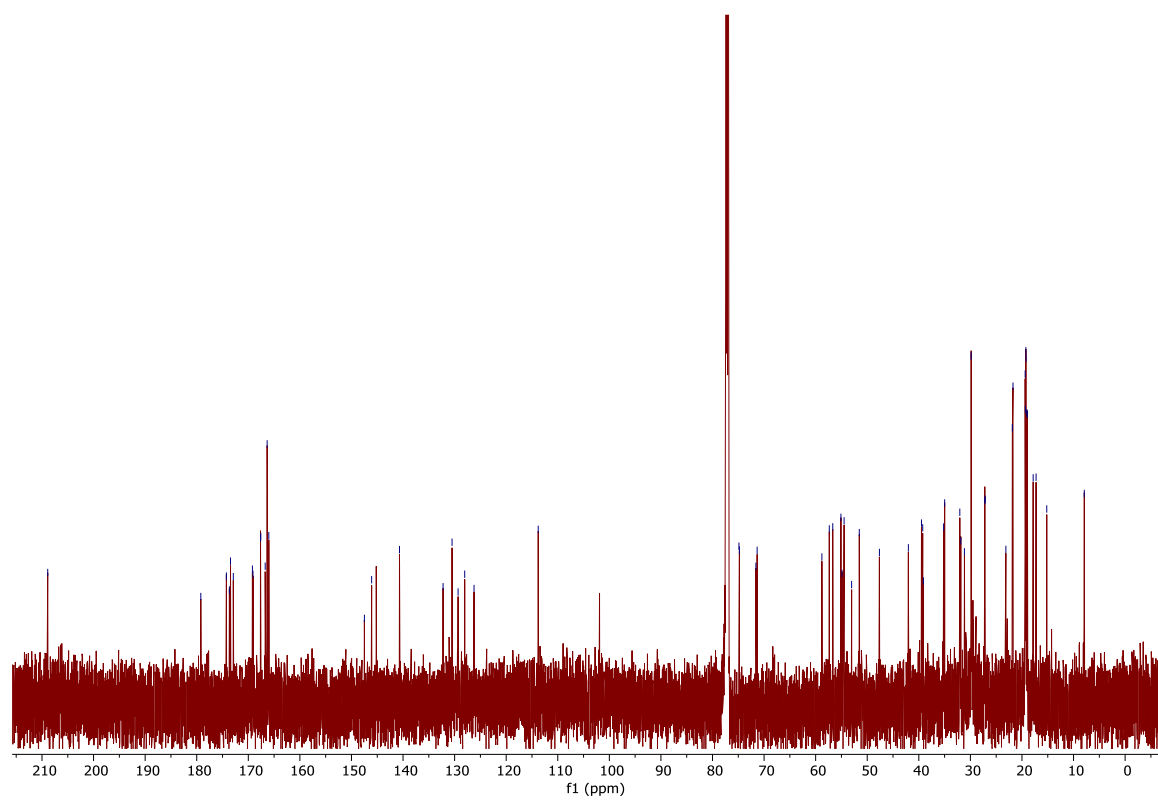

**Figure S12.**  $^1\text{H}$  NMR (600 MHz) spectrum of actinomycin X<sub>0β</sub> (**11**) in CDCl<sub>3</sub>

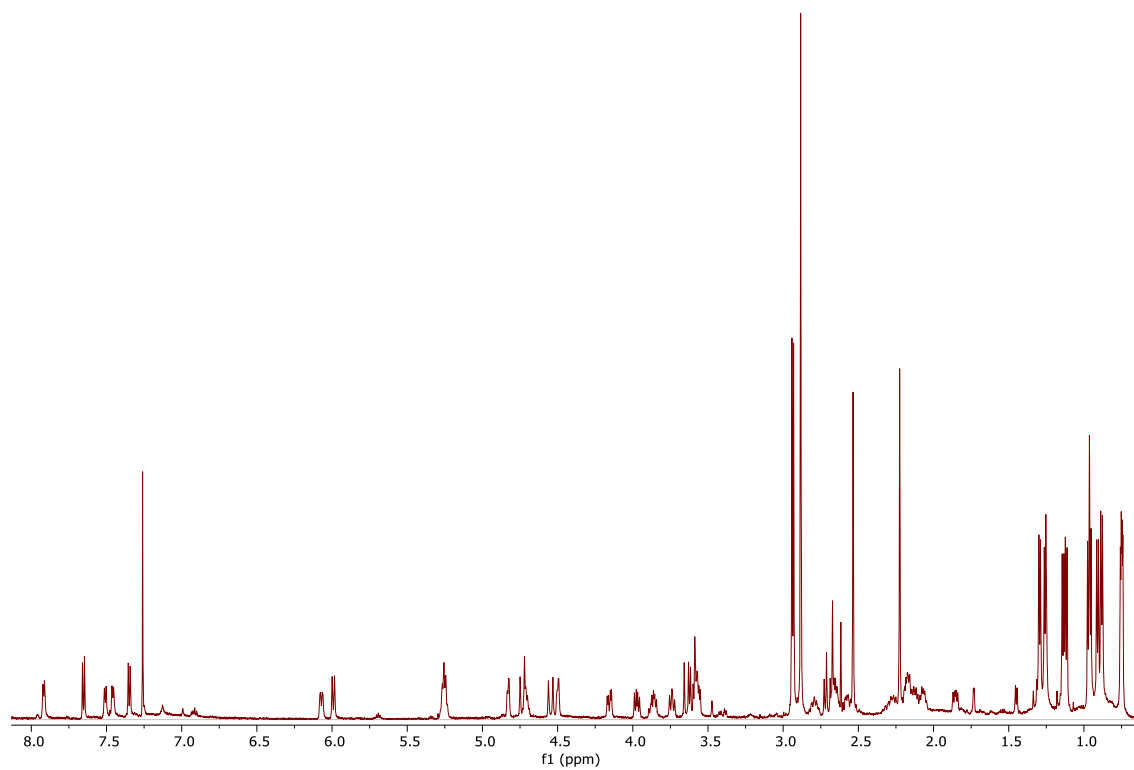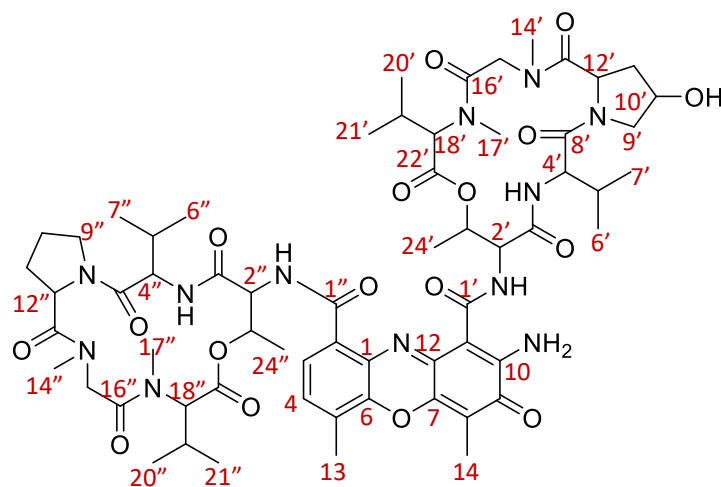

**Figure S13.**  $^1\text{H}$  NMR (600 MHz) spectrum of berberine (**12**) in  $\text{MeOH-}d_4$

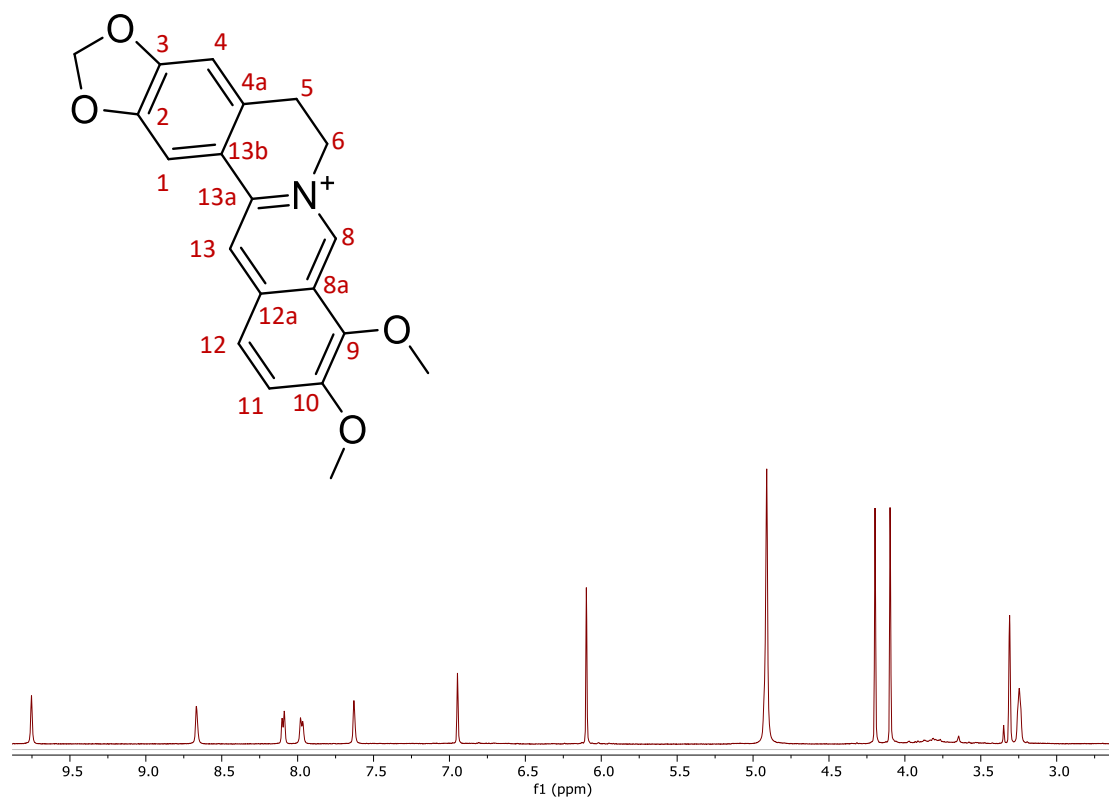

**Figure S14.**  $^{13}\text{C}$  NMR (600 MHz) spectrum of berberine (**12**) in  $\text{MeOH-}d_4$

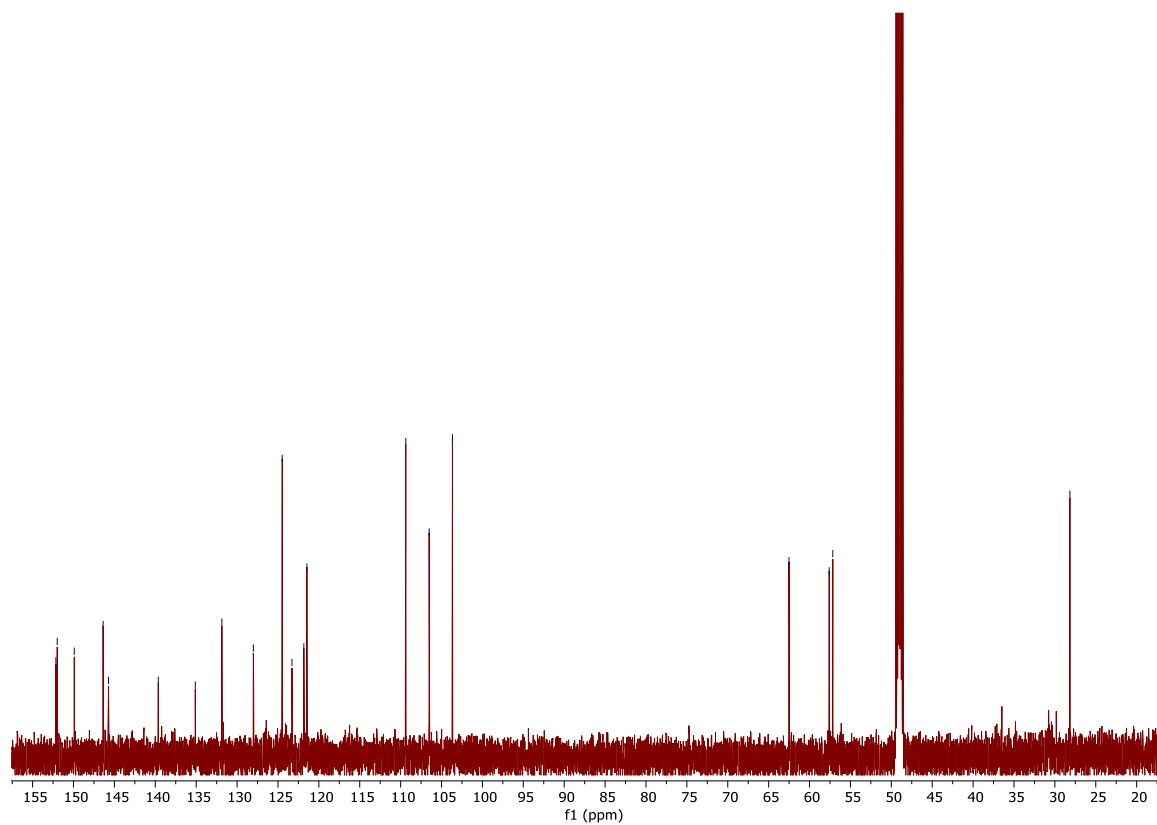

**Figure S15.**  $^1\text{H}$  NMR (600 MHz) spectrum of palmatine (**13**) in  $\text{MeOH-}d_4$

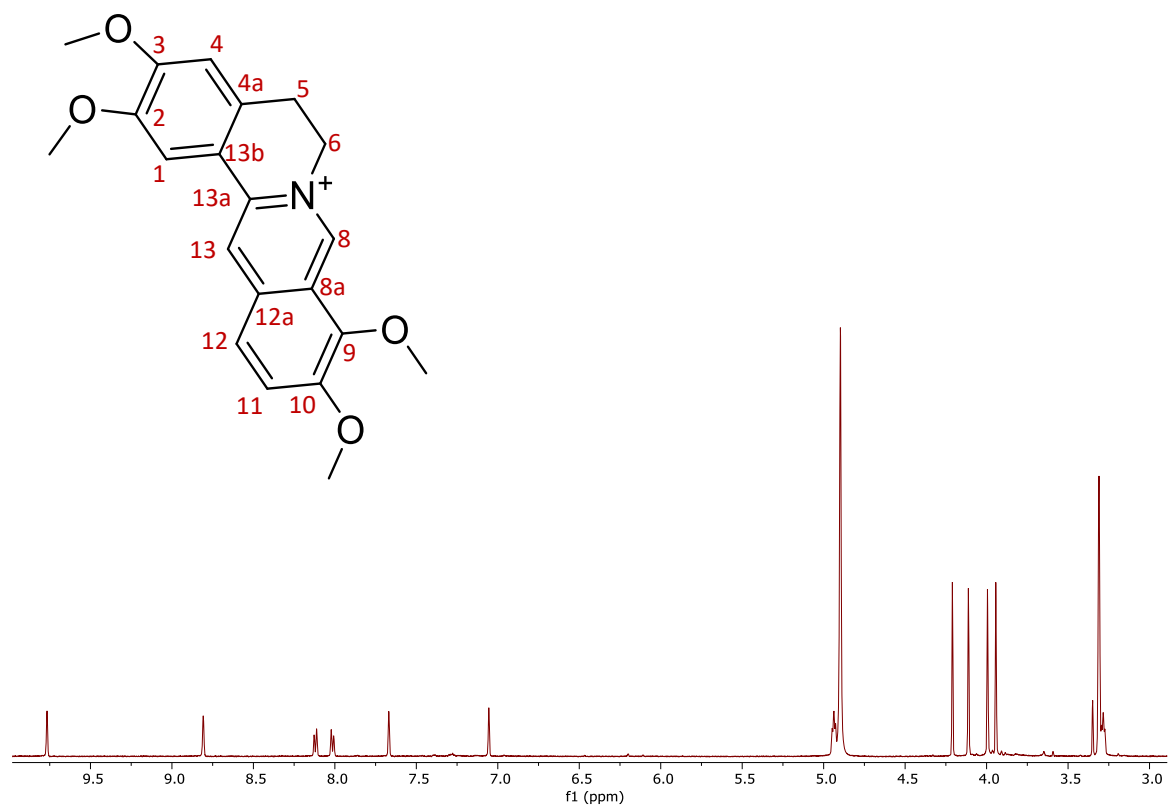

**Figure S16.**  $^{13}\text{C}$  NMR (600 MHz) spectrum of palmatine (**13**) in  $\text{MeOH-}d_4$

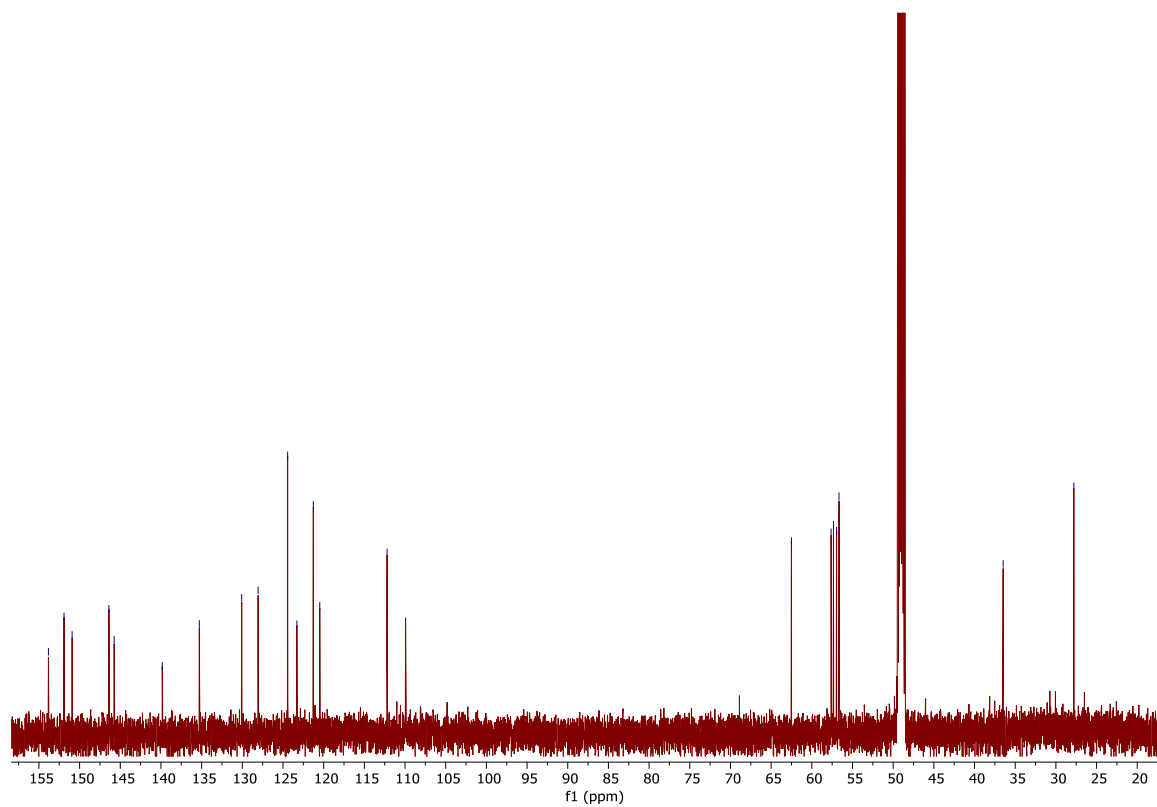



**Figure S17.**  $^1\text{H}$  NMR (600 MHz) spectrum of coptisine (**14**) in  $\text{MeOH-}d_4$

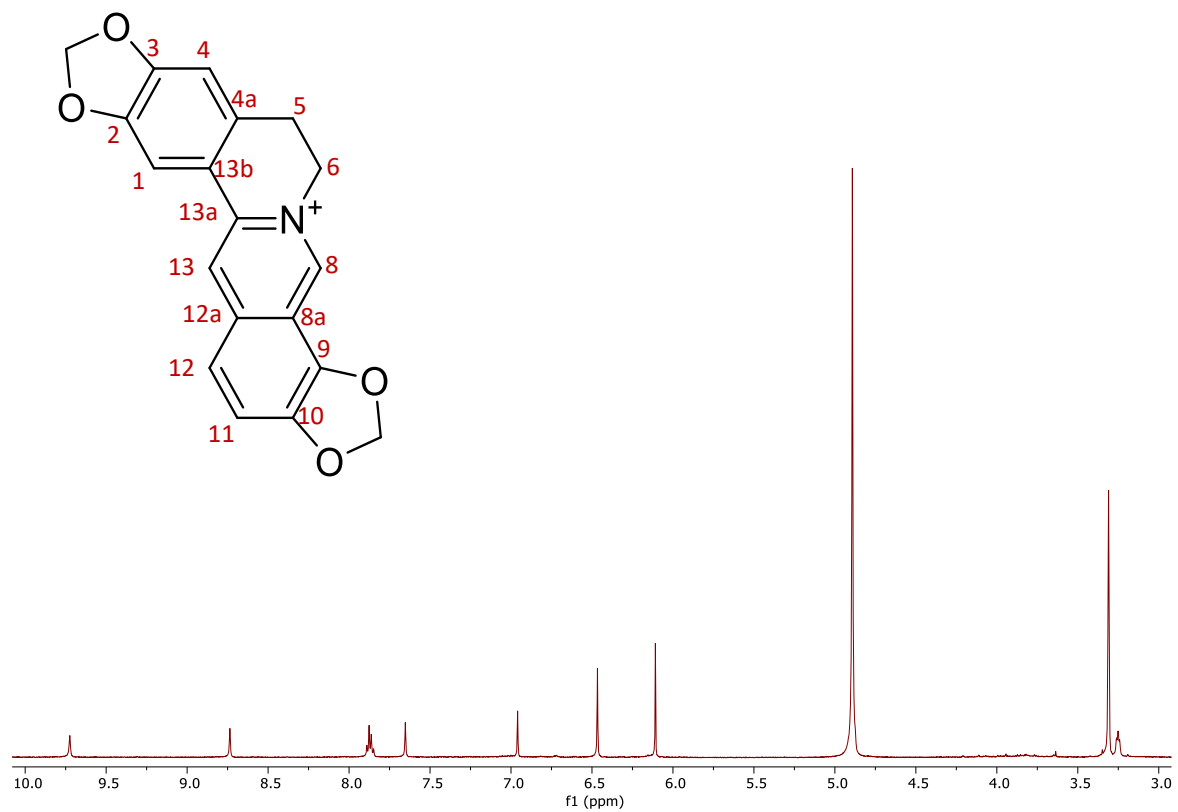

**Figure S18.**  $^{13}\text{C}$  NMR (150 MHz) spectrum of coptisine (**14**) in  $\text{MeOH-}d_4$

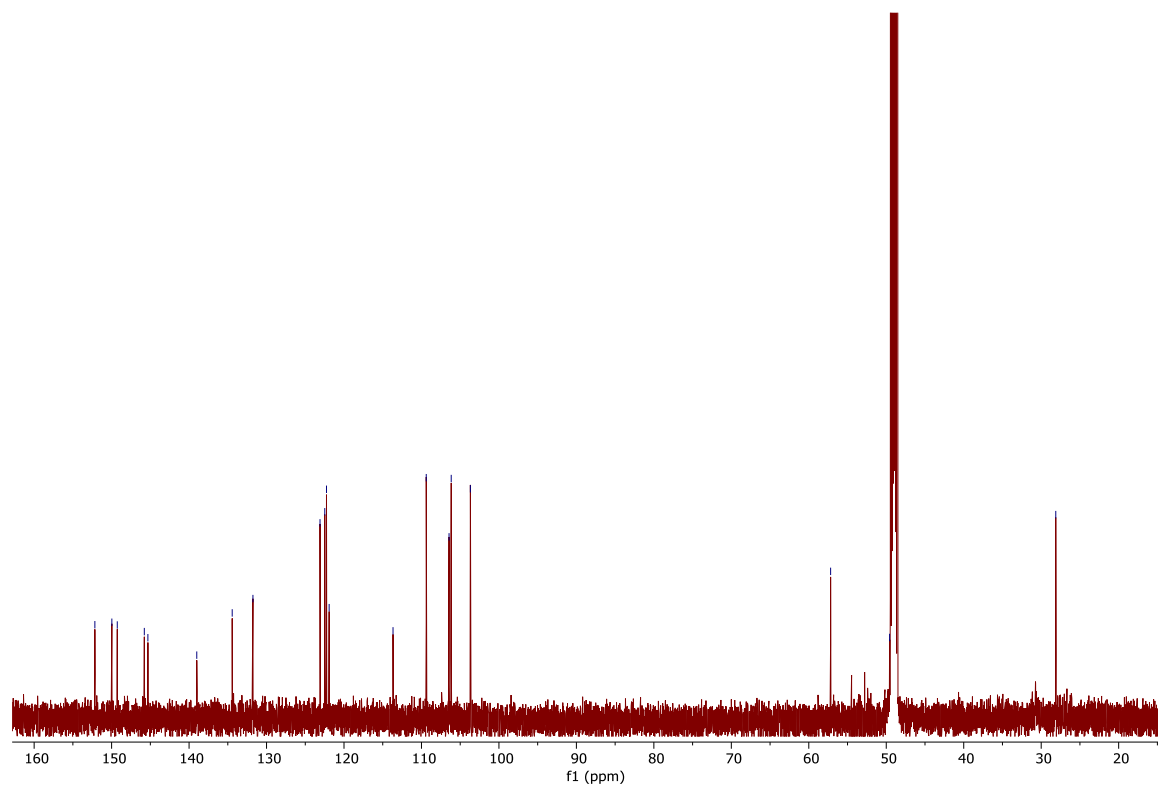

**Figure S19.**  $^1\text{H}$  NMR (500 MHz) spectrum of fangchinoline (**15**) in  $\text{CDCl}_3$

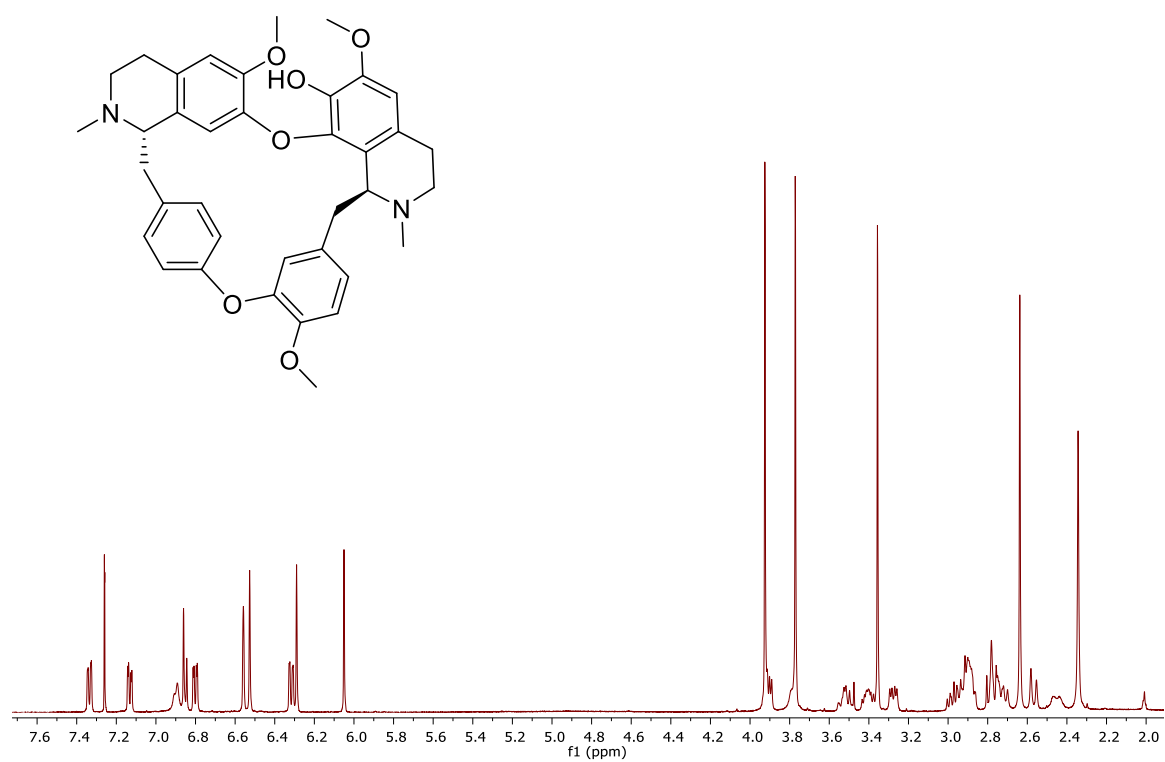

**Figure S20.**  $^1\text{H}$  NMR (500 MHz) spectrum of tetrandrine (**16**) in  $\text{CDCl}_3$

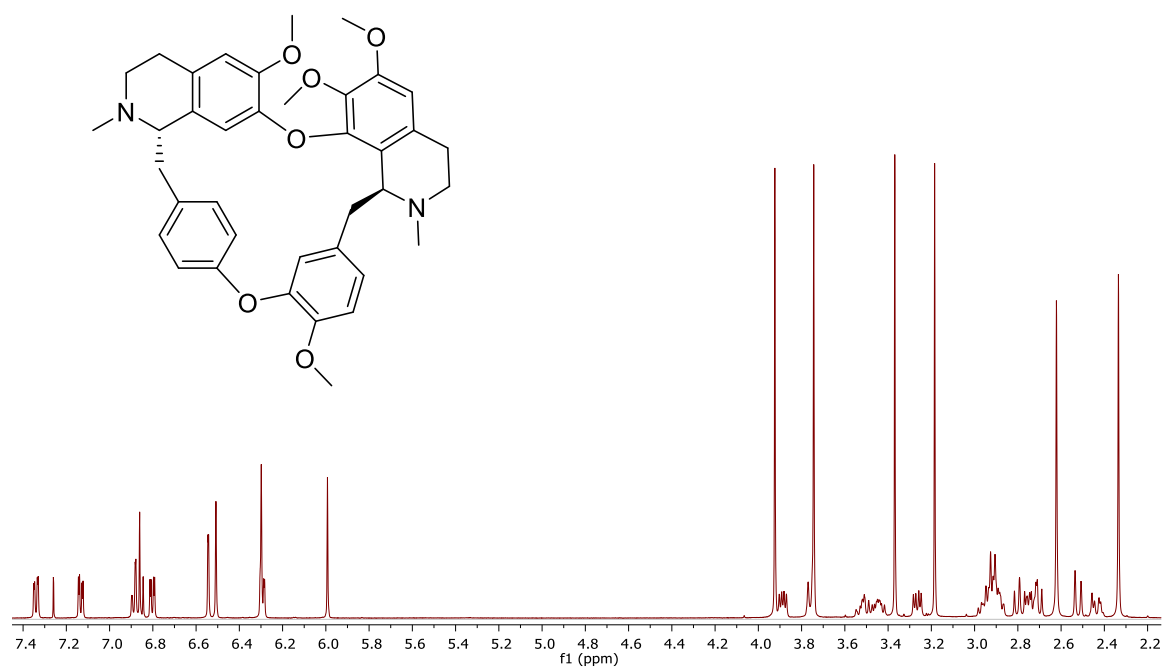

**Figure S21.**  $^1\text{H}$  NMR (500 MHz) spectrum of daurisoline (**17**) in  $\text{CDCl}_3$

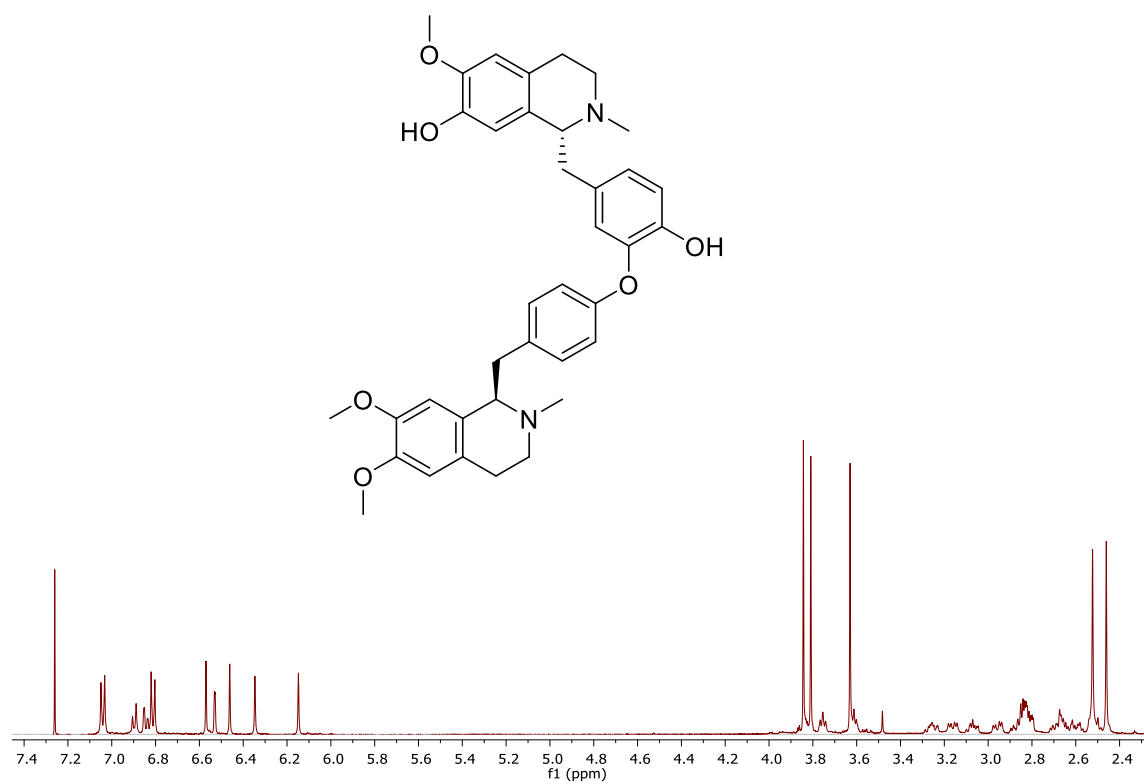

**Figure S22.**  $^1\text{H}$  NMR (500 MHz) spectrum of dauricine (**18**) in  $\text{CDCl}_3$

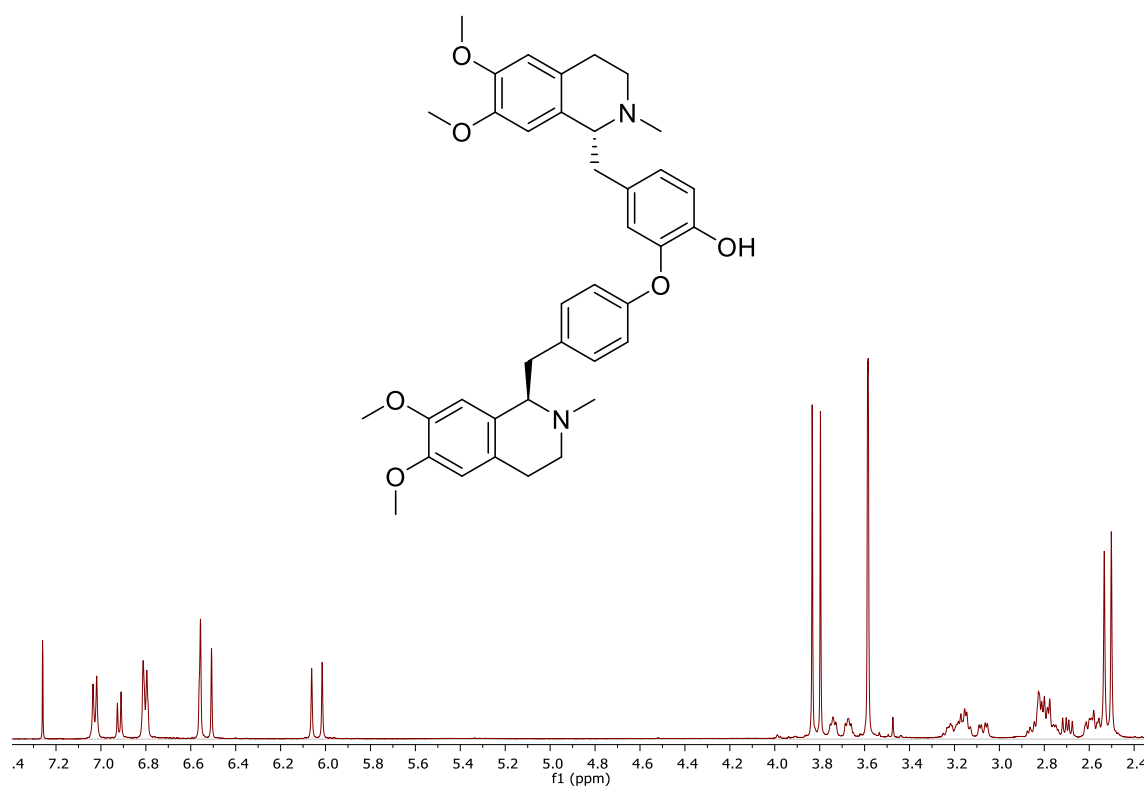

Supplement: NIHMS1810612-supplement-supple_figs_tables.pdf [file NIHMS1810612-supplement-supple_figs_tables.pdf]
